# Supplementary material for: 2D KBr/Graphene Heterostructures—Influence on Work Function and Friction
Source: MDPI journal article supplement (doi:10.3390/nano12060968), 2022-03-15
Supplement: s1 [file s1]

# Supplementary Materials for: 2D KBr/Graphene Heterostructures – Influence on Work Function and Friction

Zhao Liu <sup>1\*</sup> , Antoine Hinaut <sup>1</sup>, Stefan Peeters <sup>2</sup>, Sebastian Scherb <sup>1</sup>, Ernst Meyer <sup>1</sup>, Maria Clelia Righi <sup>2</sup> and Thilo Glatzel <sup>1\*</sup>

<sup>1</sup> Department of Physics, University of Basel, 4056 Basel, Switzerland

<sup>2</sup> Department of Physics and Astronomy, University of Bologna, 40127 Bologna, Italy

\* Correspondence: thilo.glatzel@unibas.ch (T.G.); zhao.liu@unibas.ch (Z.L.)

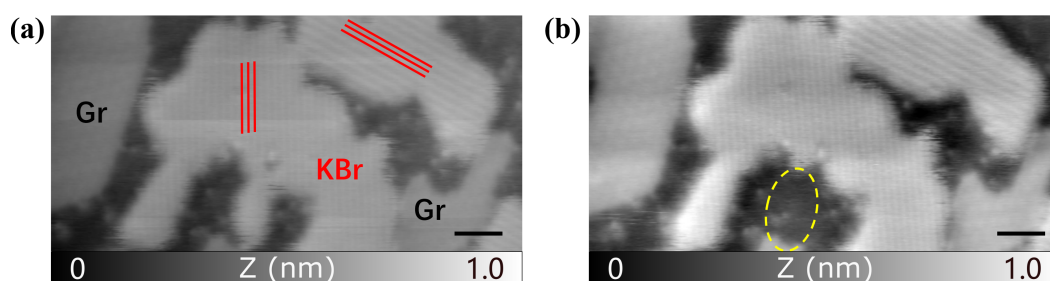

**Figure S1.** nc-AFM images of a KBr island on Ir(111) before (a) and after (b) with a missing arm (marked in a yellow dashed circle). Scale bar: 10 nm.

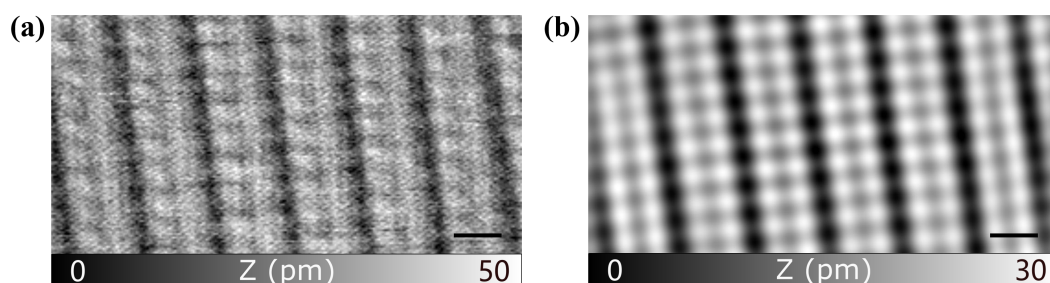

**Figure S2.** Atomic reconstructed KBr lattice on Ir(111): (a) Measured by nc-AFM. (b) Filtered by FFT. Scale bar: 1 nm.

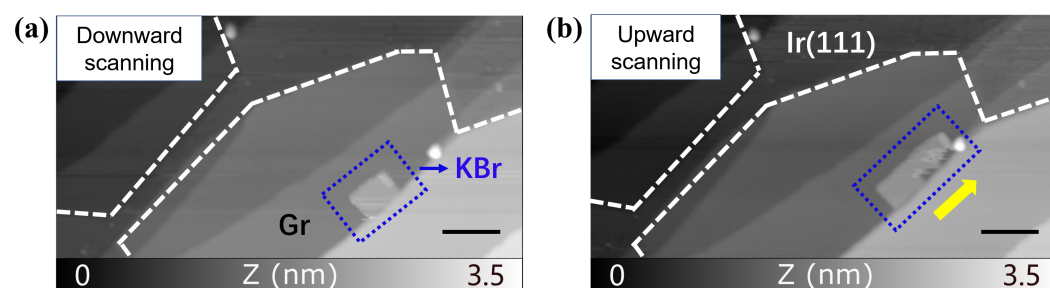

**Figure S3.** nc-AFM images of a KBr island on Gr/Ir(111) before (a) and after (b) tip manipulation with downward and upward scanning directions, respectively. Scale bar: 30 nm.
